# Supplementary material for: Evaluation of a Rapid Diagnostic Test for Detection of Burkholderia pseudomallei in the Lao People's Democratic Republic
Source: PubMed Central journal article supplement (PMC6018328; doi:10.1128/jcm.02002-17), 2018-06-25
Supplement: JCM.02002-17_zjm999096004s1.pdf [file JCM.02002-17_zjm999096004s1.pdf]

| Seeded Blood Culture | Test                          | Time  |                   |                   |
|----------------------|-------------------------------|-------|-------------------|-------------------|
|                      |                               | 0 hrs | 12 hrs            | 24 hrs            |
| 1                    | Turbid                        | No    | No                | No                |
|                      | Gram stain                    | NOS   | NOS               | GNR               |
|                      | AMD neat                      | -     | weak +            | +++               |
|                      | AMD centrifuged               | -     | weak +            | +++               |
|                      | Quantitative culture (CFU/ml) | 0     | $1.4 \times 10^5$ | $7.3 \times 10^7$ |
| 2                    | Turbid                        | No    | Yes               | Yes               |
|                      | Gram stain                    | NOS   | NOS               | GNR               |
|                      | AMD neat                      | -     | weak +            | ++                |
|                      | AMD centrifuged               | -     | +                 | +++               |
|                      | Quantitative culture (CFU/ml) | 0     | $2.1 \times 10^6$ | $3.1 \times 10^8$ |
| 3                    | Turbid                        | No    | No                | Yes               |
|                      | Gram stain                    | NOS   | NOS               | GNR               |
|                      | AMD neat                      | -     | weak +            | ++                |
|                      | AMD centrifuged               | -     | +                 | +++               |
|                      | Quantitative culture (CFU/ml) | 0     | $1.8 \times 10^6$ | $1.6 \times 10^8$ |
| 4                    | Turbid                        | No    | No                | No                |
|                      | Gram stain                    | NOS   | NOS               | GNR               |
|                      | AMD neat                      | -     | weak +            | ++                |
|                      | AMD centrifuged               | -     | weak +            | +++               |
|                      | Quantitative culture (CFU/ml) | 0     | $1.7 \times 10^5$ | $2.0 \times 10^8$ |

Note: NOS = no organisms seen; - = negative; + = positive.

**Supplemental Table S1.** Analytical sensitivity.

| Organism                          | Reference Strain or Clinical isolate     | AMD result |
|-----------------------------------|------------------------------------------|------------|
| <i>Escherichia coli</i>           | ATCC 25922                               | negative   |
| <i>Klebsiella pneumoniae</i>      | ATCC 700603                              | negative   |
| <i>Klebsiella oxytoca</i>         | NCTC 8167                                | negative   |
| <i>Enterobacter aerogenes</i>     | NCTC 10006                               | negative   |
| <i>Enterobacter cloacae</i>       | NCTC 11580                               | negative   |
| <i>Citrobacter freundii</i>       | NCTC 9750                                | negative   |
| <i>Edwardsiella tarda</i>         | NCTC 10396                               | negative   |
| <i>Salmonella</i> Typhi           | NCTC 786                                 | negative   |
| <i>Salmonella</i> Enteritidis     | ATCC 13076                               | negative   |
| <i>Pseudomonas aeruginosa</i>     | ATCC 27853                               | negative   |
| <i>Acinetobacter baumannii</i>    | NCTC 12156                               | negative   |
| <i>Ochrobactrum anthropi</i>      | NCTC 12168                               | negative   |
| <i>Aeromonas hydrophila</i>       | NCTC 8049                                | negative   |
| <i>Yersinia enterocolitica</i>    | NCTC 11175                               | negative   |
| <i>Vibrio cholerae</i>            | NCTC 8021                                | negative   |
| <i>Burkholderia thailandensis</i> | NR-9908 (E426)                           | negative   |
| <i>Burkholderia cepacia</i>       | NCTC 10743                               | negative   |
| <i>Staphylococcus aureus</i>      | ATCC 29213                               | negative   |
| <i>Staphylococcus epidermidis</i> | NCTC 11047                               | negative   |
| <i>Burkholderia thailandensis</i> | Soil isolate E555*                       | positive   |
| <i>Burkholderia thailandensis</i> | Water isolate ST10*                      | positive   |
| <i>Burkholderia pseudomallei</i>  | Clinical isolate (blood culture UI27784) | positive   |
| <i>Burkholderia pseudomallei</i>  | Clinical isolate (blood culture UI28310) | positive   |
| <i>Burkholderia pseudomallei</i>  | Clinical isolate (blood culture FS4001)  | positive   |
| <i>Burkholderia pseudomallei</i>  | Clinical isolate (blood culture FS4025)  | positive   |
| <i>Burkholderia cepacia</i>       | Clinical isolate (sputum 39628**)        | positive   |

\*Known *B. pseudomallei* latex agglutination positive \*\*Lao clinical isolate giving false positive latex agglutination result, confirmed as *B. cepacia* complex by API20NE and subsequent 16S sequencing.

**Supplemental Table S2.** Analytical specificity.

| <b>Report as:</b> | <b>X1000 magnification</b>               |
|-------------------|------------------------------------------|
| Scanty            | 1-9 bacilli per slide/ 100 fields        |
| 1+                | 10-99 bacilli per slide/ 100 fields      |
| 2+                | 1-10 bacilli per field (check 50 fields) |
| 3+                | >10 bacilli per field (check 20 fields)  |

**Supplemental Table S3.** Schema for quantification of positive IFA results.

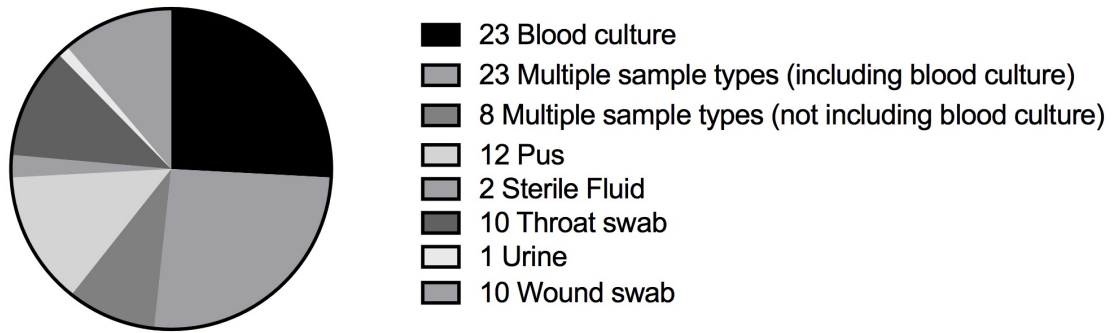

**Supplemental Figure S1.** Sample types culture positive for *B. pseudomallei*

in confirmed melioidosis cases June – December 2014 (N = 89).

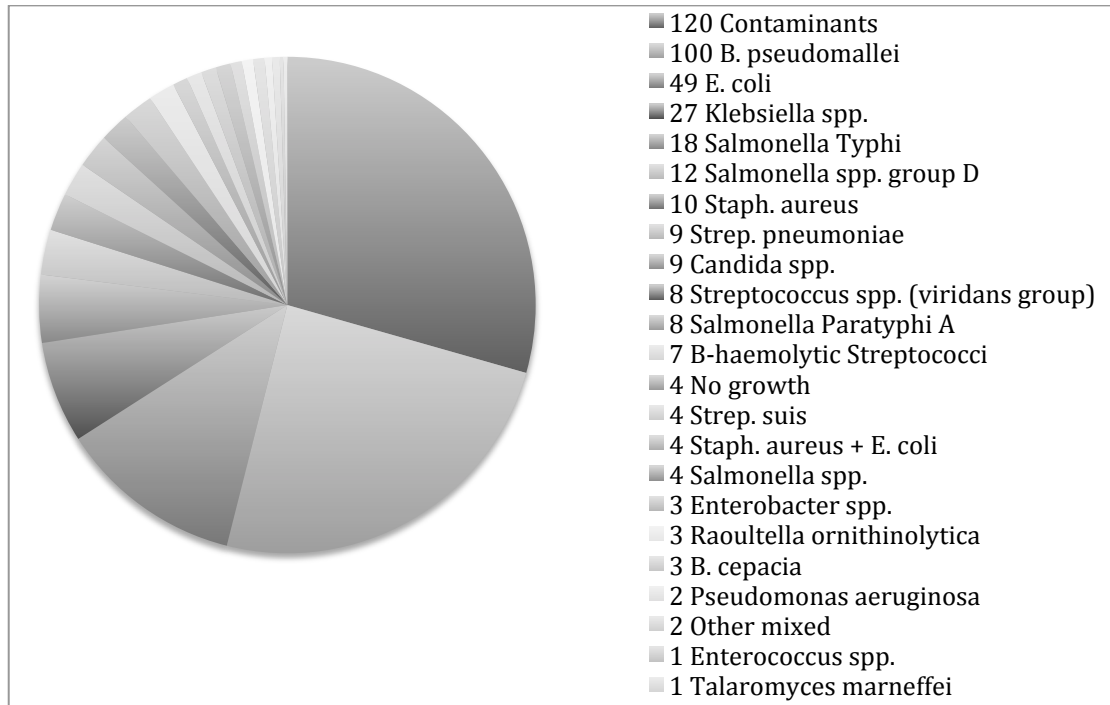

**Supplemental Figure S2.** Organisms isolated from turbid blood culture broths 26<sup>th</sup> June – 18<sup>th</sup> December 2014 (N = 408 blood culture bottles from 247 patients).

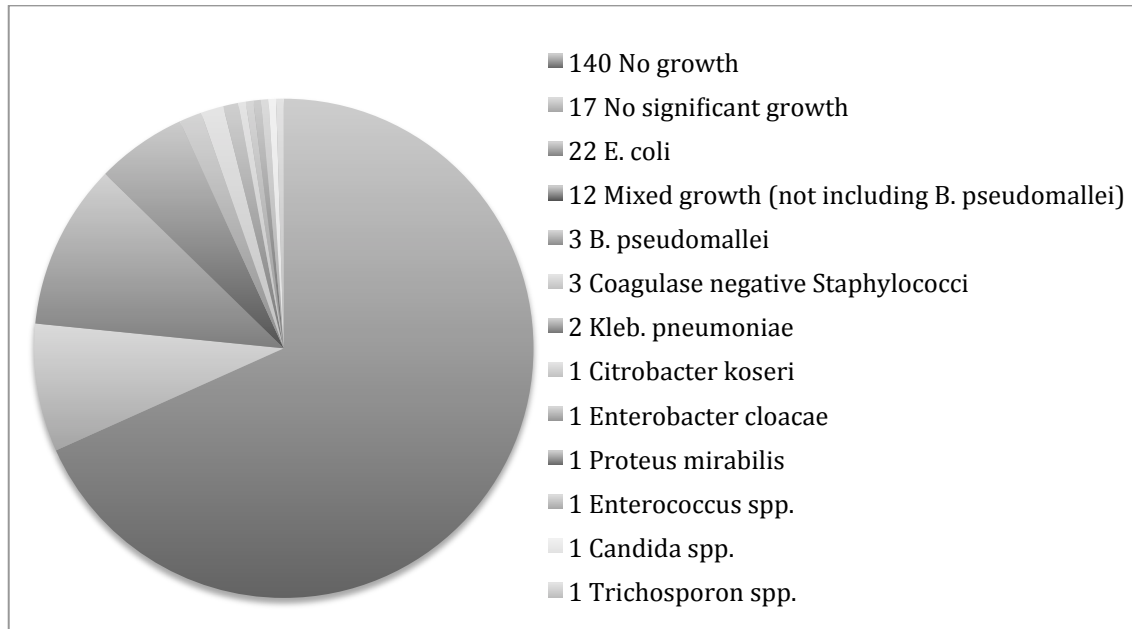

**Supplemental Figure S3.** Organisms isolated from culture of unselected urine samples 2<sup>nd</sup> July – 2<sup>nd</sup> Sept. 2014 (N = 205).
